# Supplementary material for: A novel proton-selective sensor based on a sugar with hinge flexibility
Source: Royal Society of Chemistry journal article supplement (doi:10.1039/b709115j), 2007-01-01
Supplement: b709115j.pdf [file b709115j.pdf]

## Supplementary Information

# A Hinge-Sugar-Based Proton Selective Sensor

*Hideya Yuasa, \* Naohiko Fujii and Shun Yamazaki*

### Table of contents

|                                                                                                                                                                 |     |
|-----------------------------------------------------------------------------------------------------------------------------------------------------------------|-----|
| Figure S1. <sup>1</sup> H NMR of compound <b>3</b> in CDCl <sub>3</sub> .                                                                                       | S2  |
| Figure S2. <sup>1</sup> H NMR of compound <b>3</b> in DMF- <i>d</i> <sub>7</sub> .                                                                              | S3  |
| Figure S3. <sup>13</sup> C NMR of compound <b>3</b> in CDCl <sub>3</sub> .                                                                                      | S4  |
| Figure S4. <sup>1</sup> H NMR of compound <b>3</b> in CDCl <sub>3</sub> in the presence of CF <sub>3</sub> COOD (0.5 equiv).                                    | S5  |
| Figure S5. <sup>1</sup> H NMR of compound <b>3</b> in DMF- <i>d</i> <sub>7</sub> in the presence of Zn(OAc) <sub>2</sub> (2.0 equiv) at 80 °C.                  | S6  |
| Figure S6. <sup>1</sup> H NMR of compound <b>4</b> in 50 mM AcONa- <i>d</i> <sub>3</sub> (pH 7.0).                                                              | S7  |
| Figure S7. <sup>13</sup> C NMR of compound <b>4</b> in CD <sub>3</sub> OD.                                                                                      | S8  |
| Figure S8. <sup>1</sup> H NMR of compound <b>4</b> in D <sub>2</sub> O in the presence of CF <sub>3</sub> COOD (1.0 equiv) at 70 °C.                            | S9  |
| Figure S9. <sup>1</sup> H NMR of compound <b>4</b> in 50 mM AcONa- <i>d</i> <sub>3</sub> (pH 7.0) in the presence of Zn(OAc) <sub>2</sub> (2.0 equiv) at 80 °C. | S10 |
| Figure S10. <sup>1</sup> H NMR of compound <b>5</b> in DMSO- <i>d</i> <sub>6</sub> .                                                                            | S11 |
| Figure S11. <sup>13</sup> C NMR of compound <b>5</b> in CDCl <sub>3</sub> .                                                                                     | S12 |
| Figure S12. <sup>1</sup> H NMR of compound <b>5</b> in DMSO- <i>d</i> <sub>6</sub> in the presence of Zn(OAc) <sub>2</sub> (2.0 equiv) at 120 °C.               | S13 |
| Figure S13. <sup>1</sup> H NMR of compound <b>5</b> in DMSO- <i>d</i> <sub>6</sub> in the presence of CF <sub>3</sub> COOD (1.0 equiv) at 80 °C.                | S14 |
| Figure S14. <sup>1</sup> H NMR of compound <b>5</b> in DMSO- <i>d</i> <sub>6</sub> in the presence of CF <sub>3</sub> COOD (10 equiv) at room temperature.      | S15 |

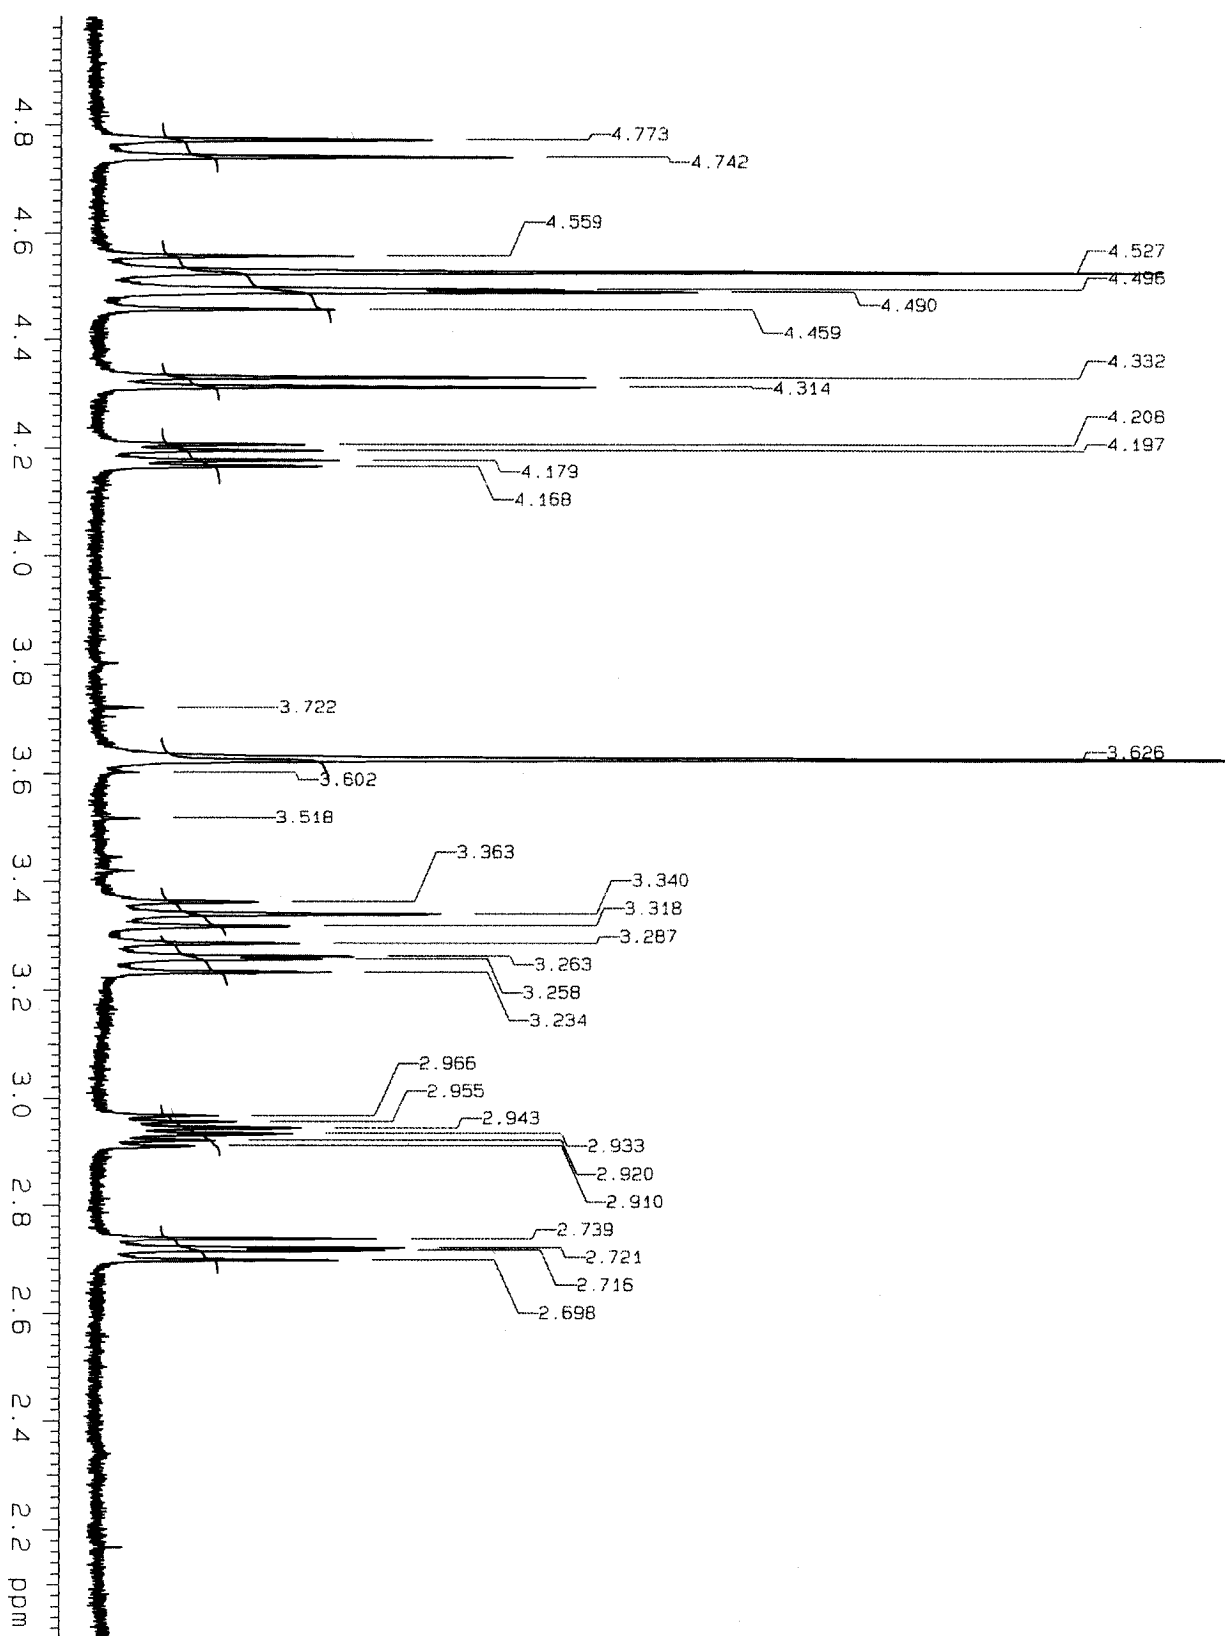

Fig S1.  $^1\text{H}$  NMR of compound **3** in  $\text{CDCl}_3$ .

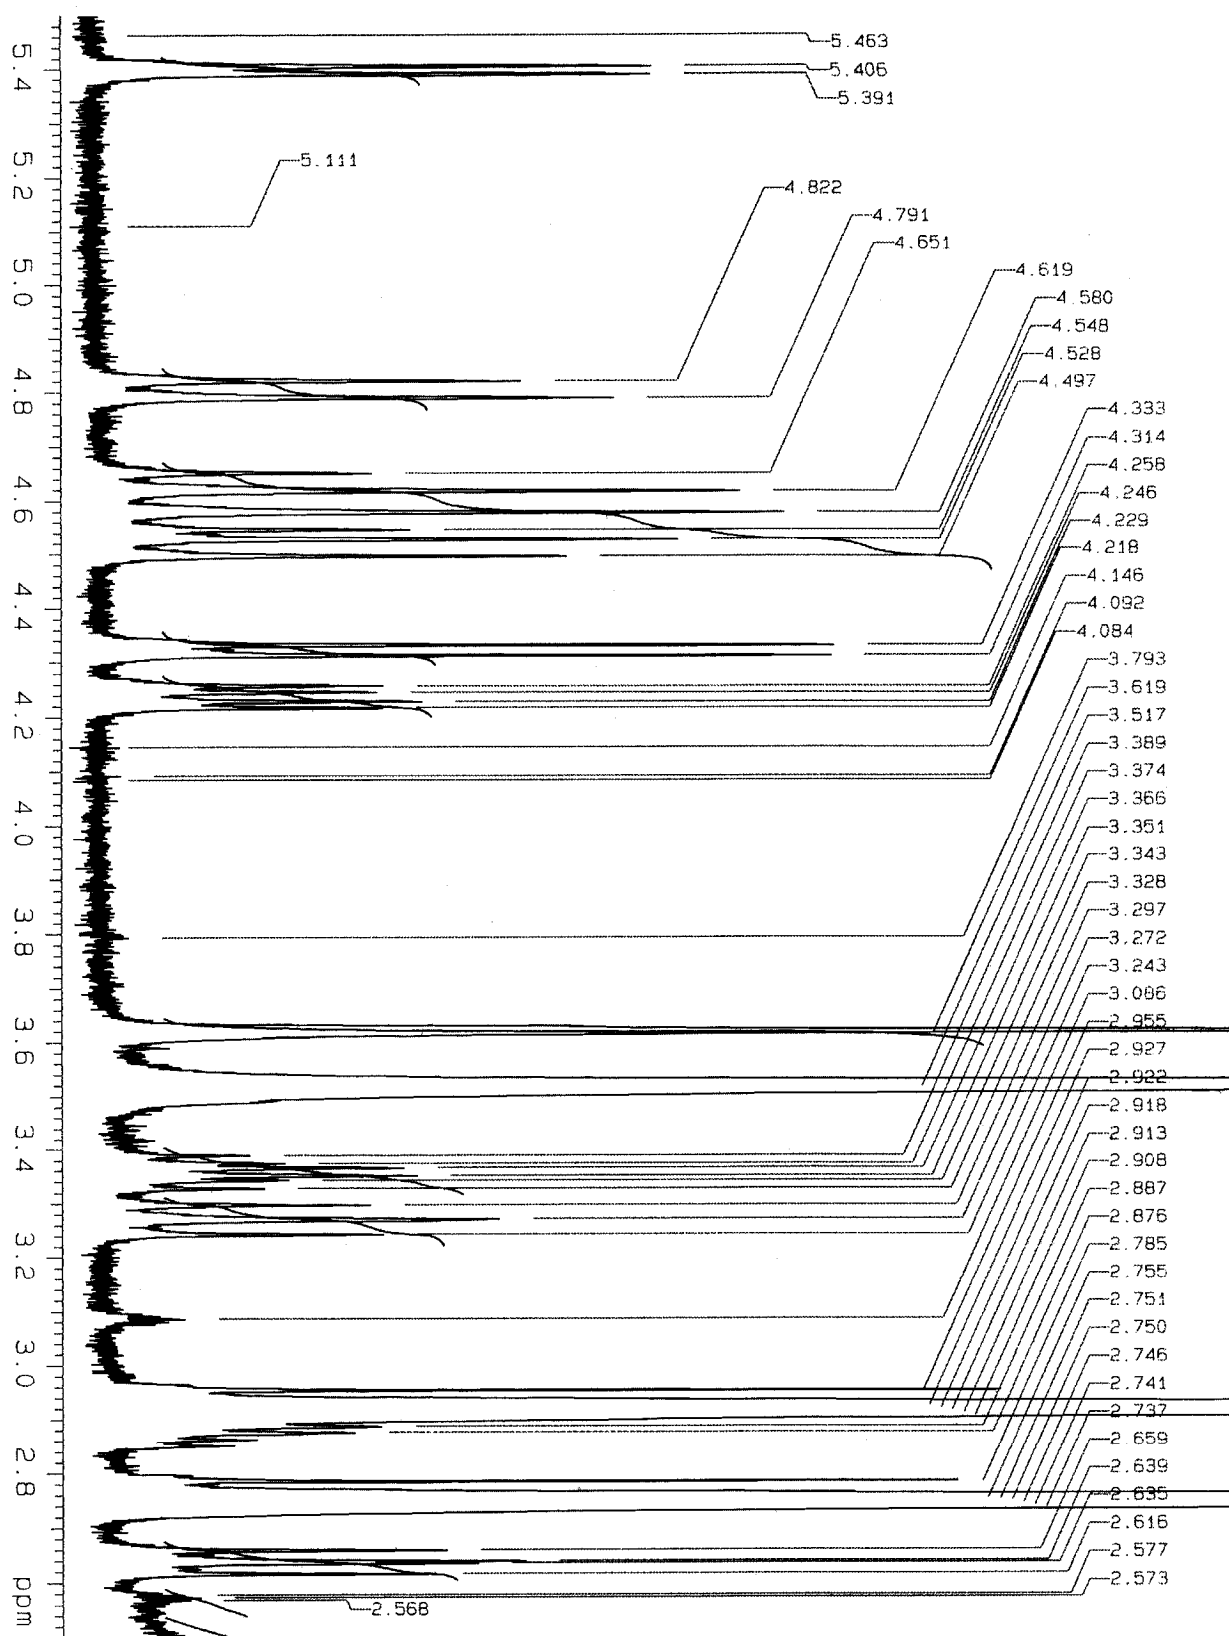

Fig S2.  $^1\text{H}$  NMR of compound **3** in  $\text{DMF-}d_7$ .

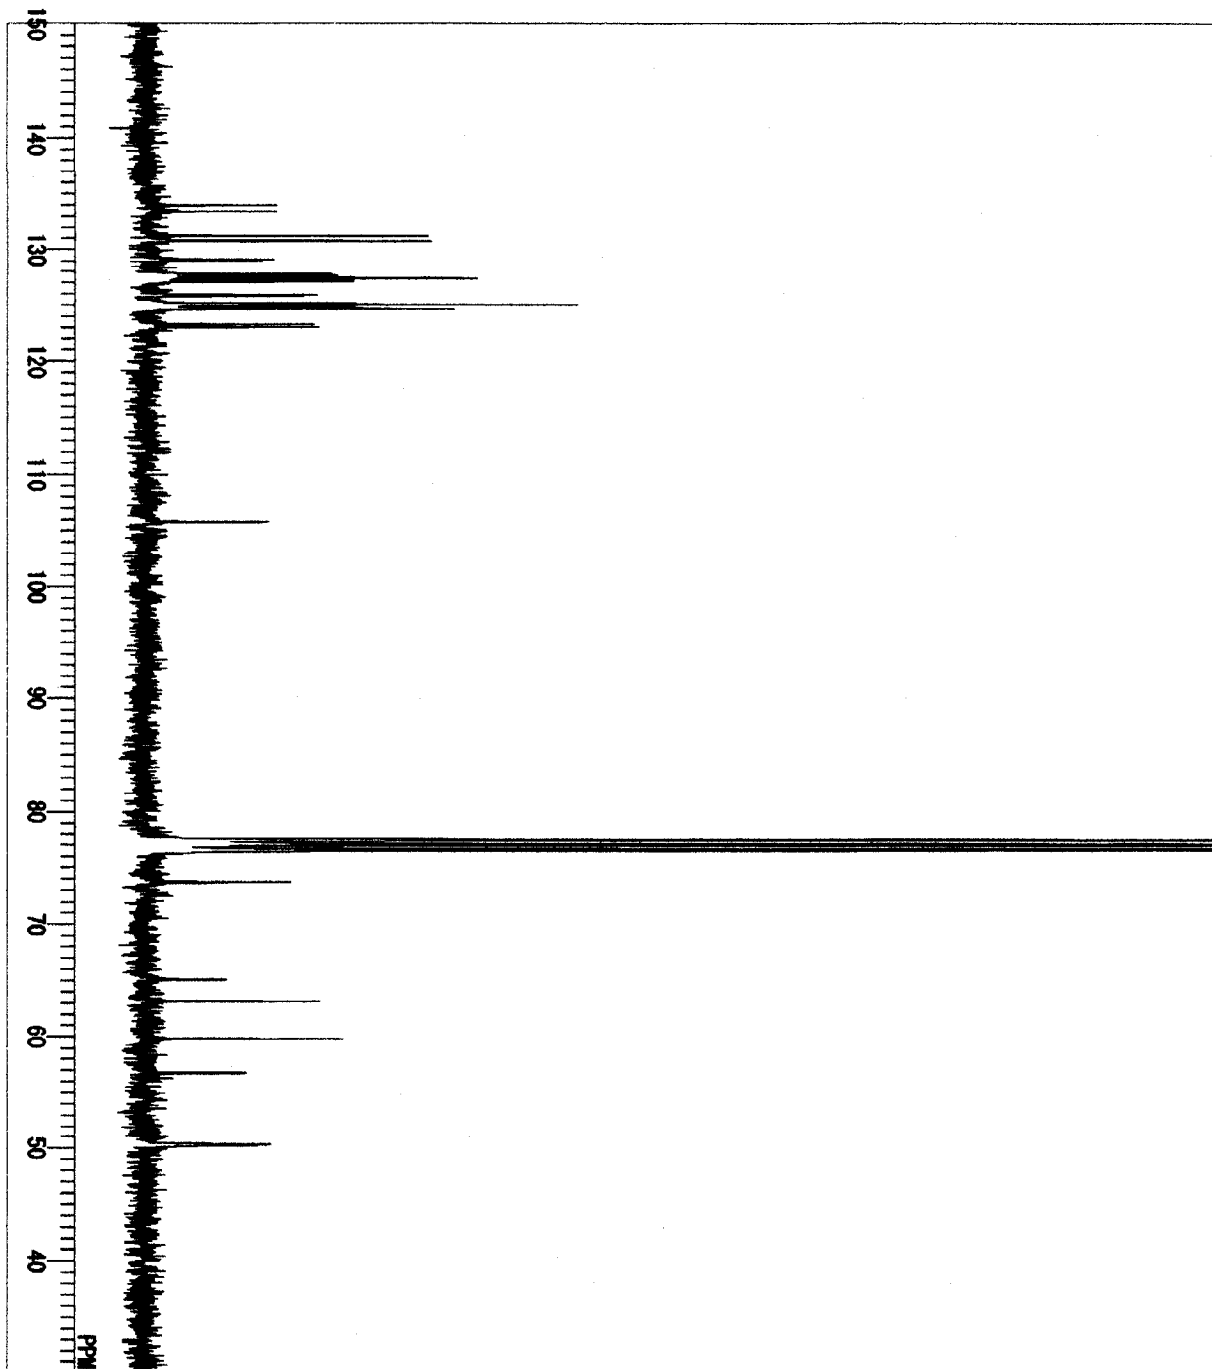

Fig S3.  $^{13}\text{C}$  NMR of compound **3** in  $\text{CDCl}_3$ .

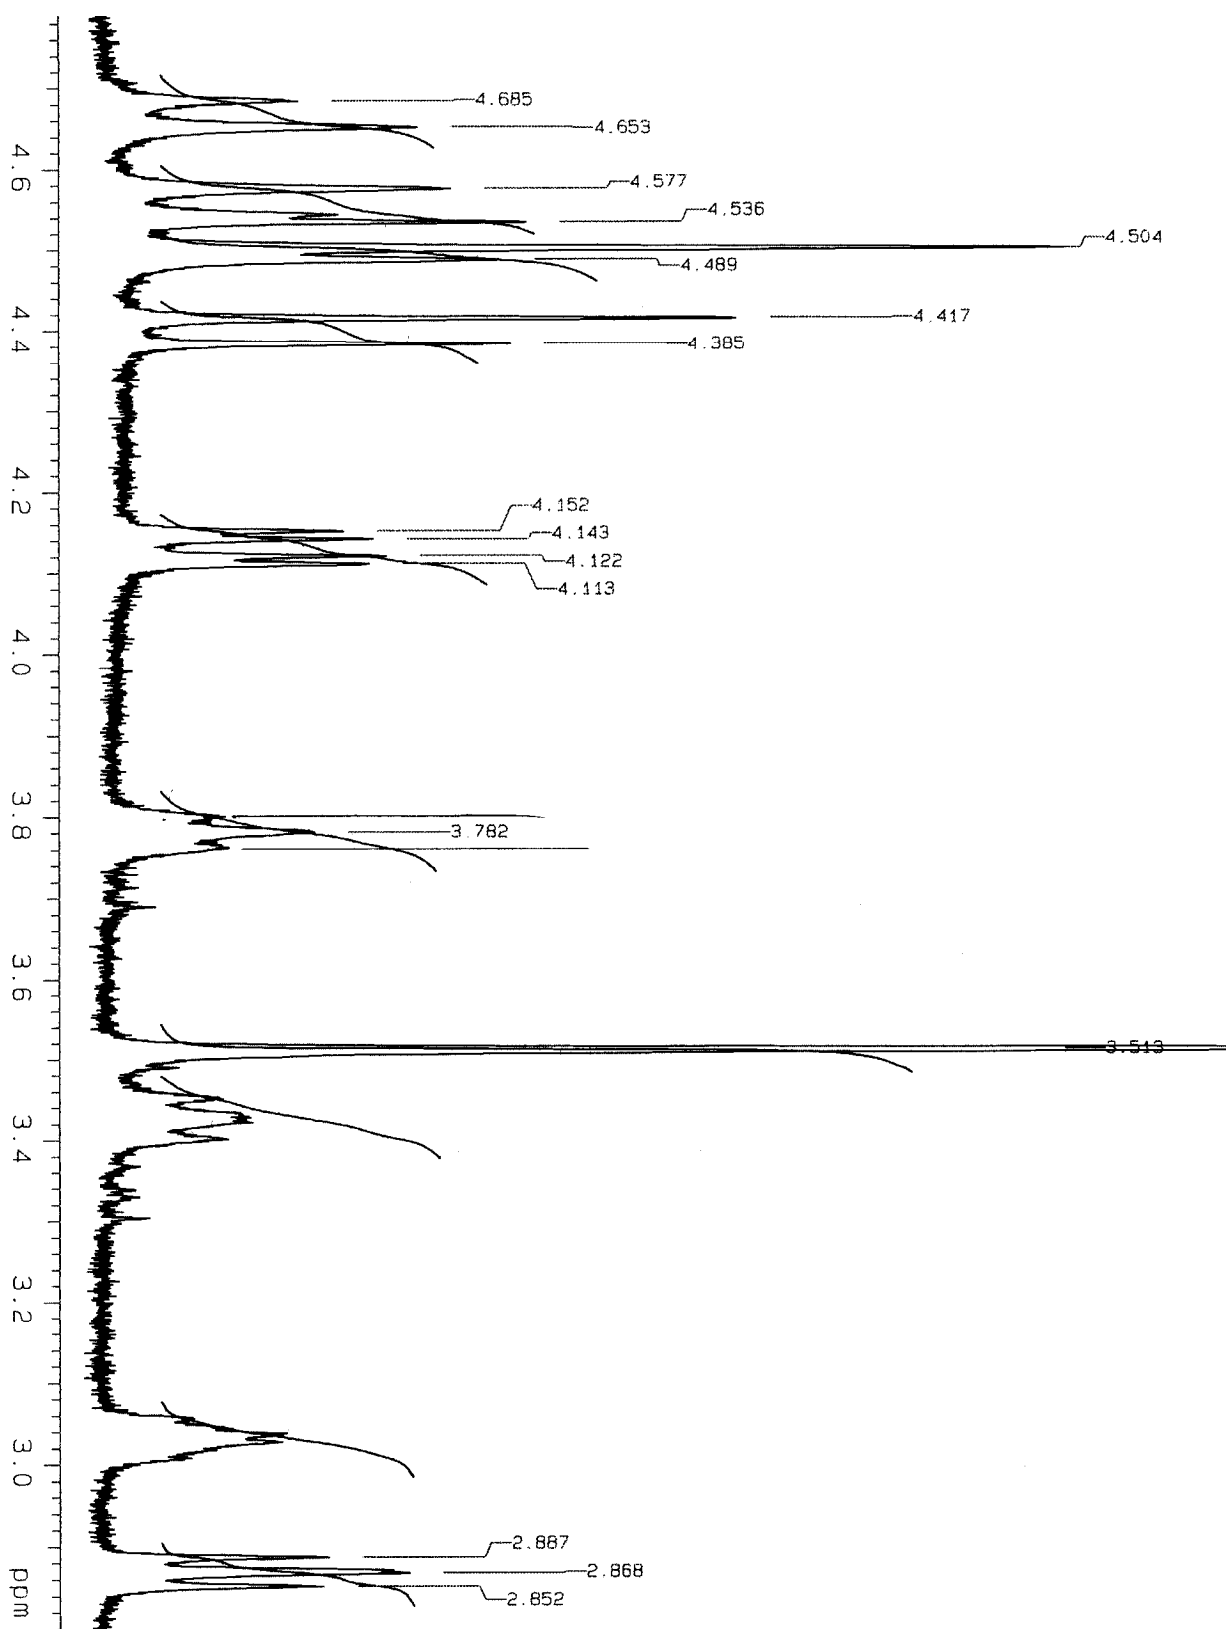

Fig S4.  $^1\text{H}$  NMR of compound **3** in  $\text{CDCl}_3$  in the presence of  $\text{CF}_3\text{COOD}$  (0.5 equiv).

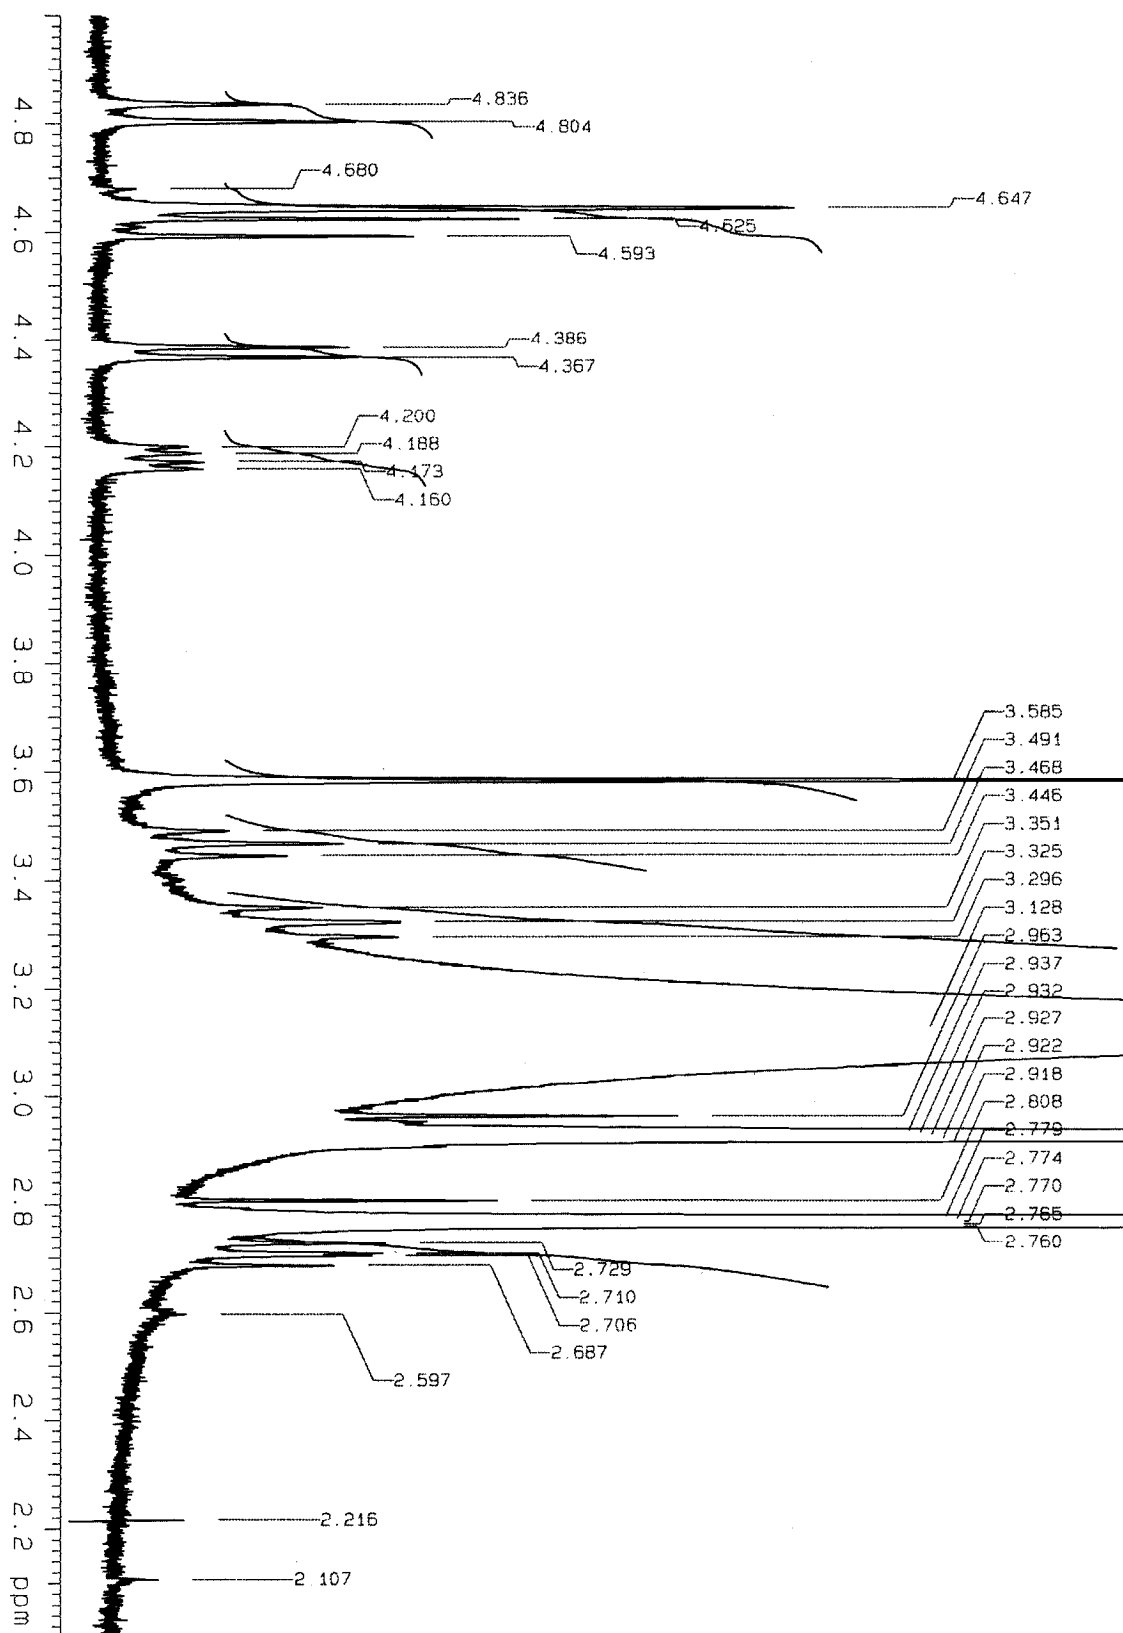

Fig S5.  $^1\text{H}$  NMR of compound **3** in  $\text{DMF-}d_7$  in the presence of  $\text{Zn}(\text{OAc})_2$  (2.0 equiv) at  $80\text{ }^\circ\text{C}$ .

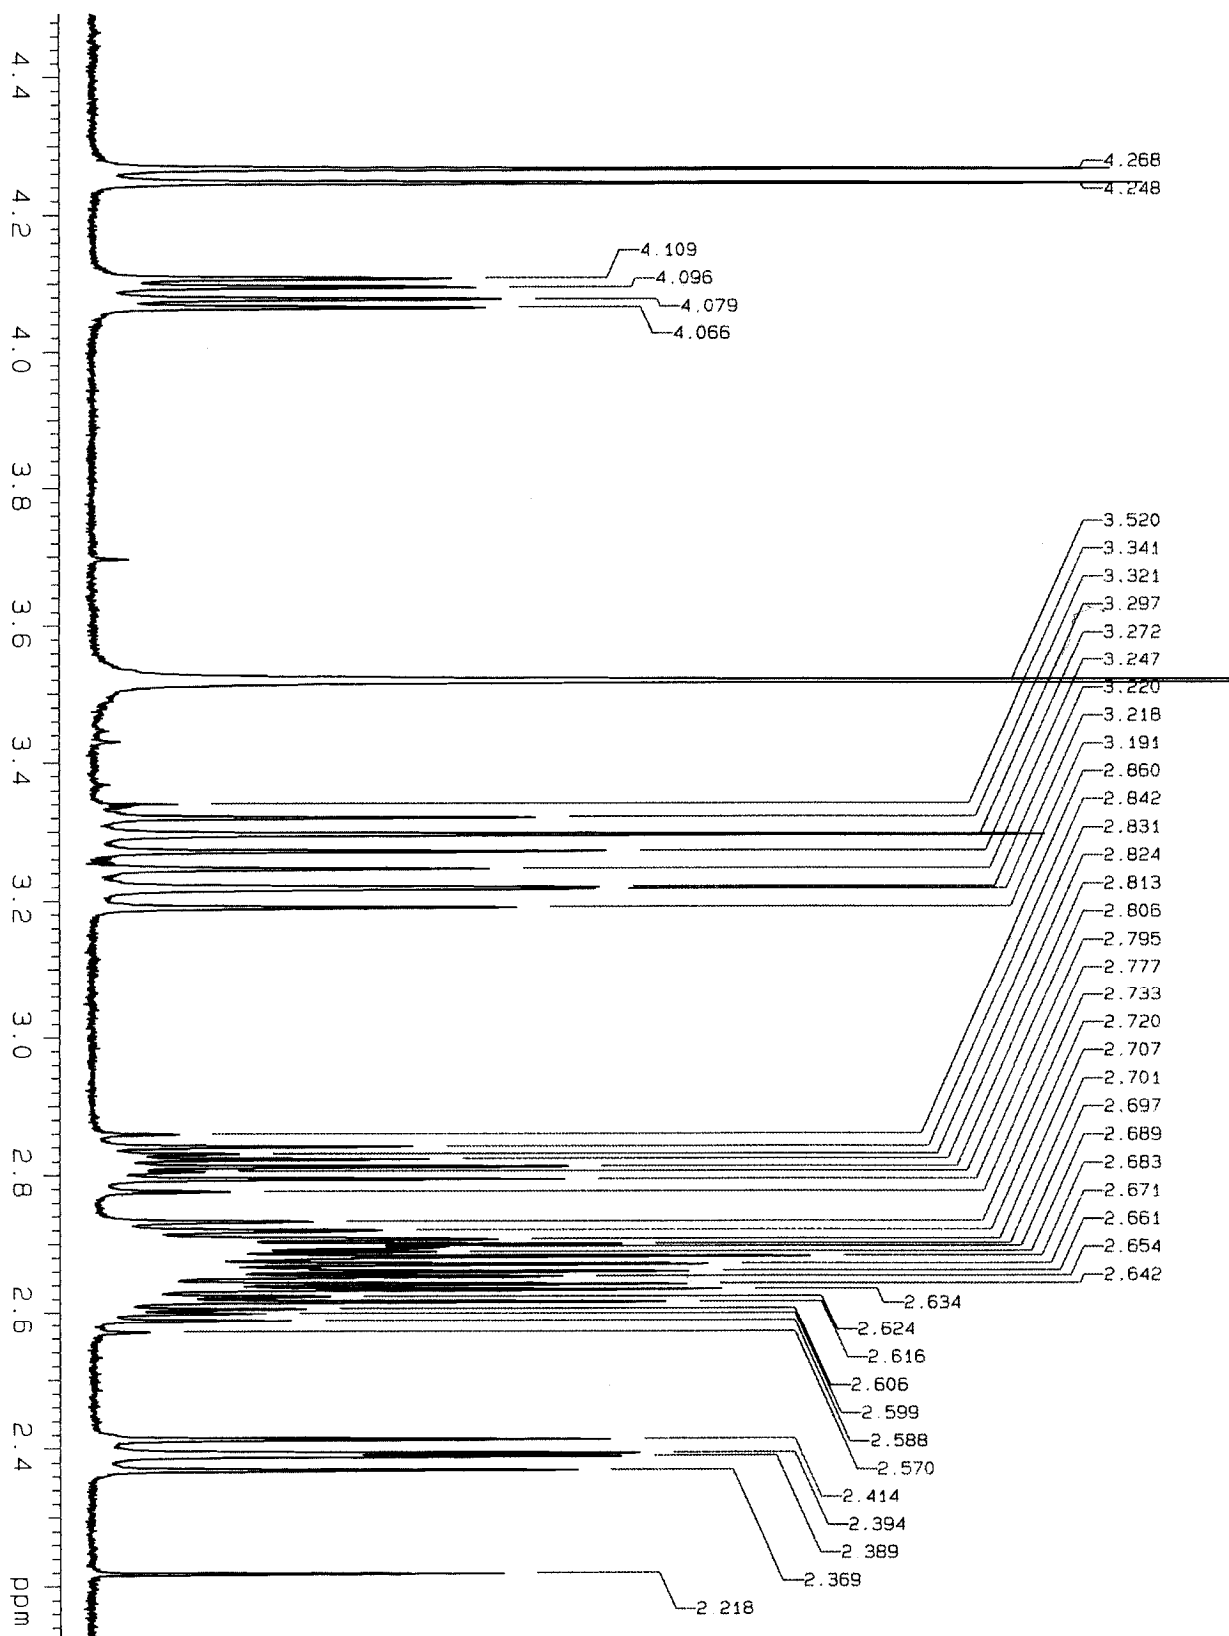

Fig S6.  $^1\text{H}$  NMR of compound **4** in 50 mM AcONa- $d_3$  (pH 7.0).

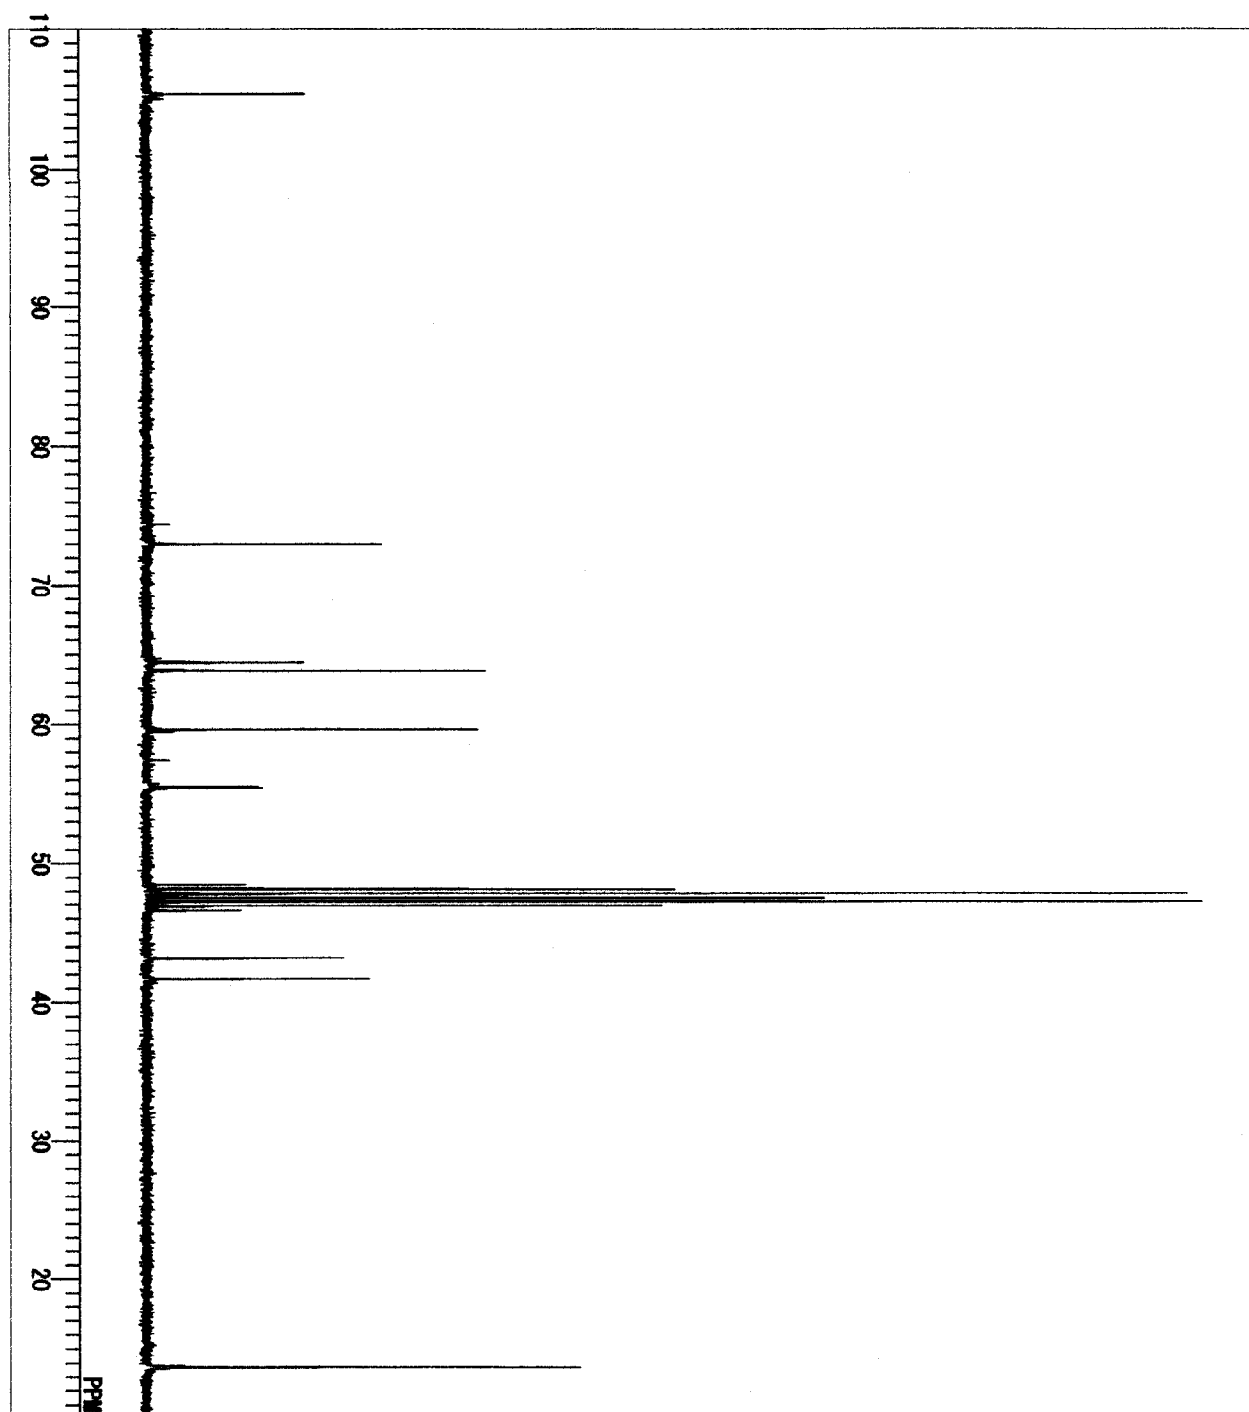

Fig S7.  $^{13}\text{C}$  NMR of compound **4** in  $\text{CD}_3\text{OD}$ .



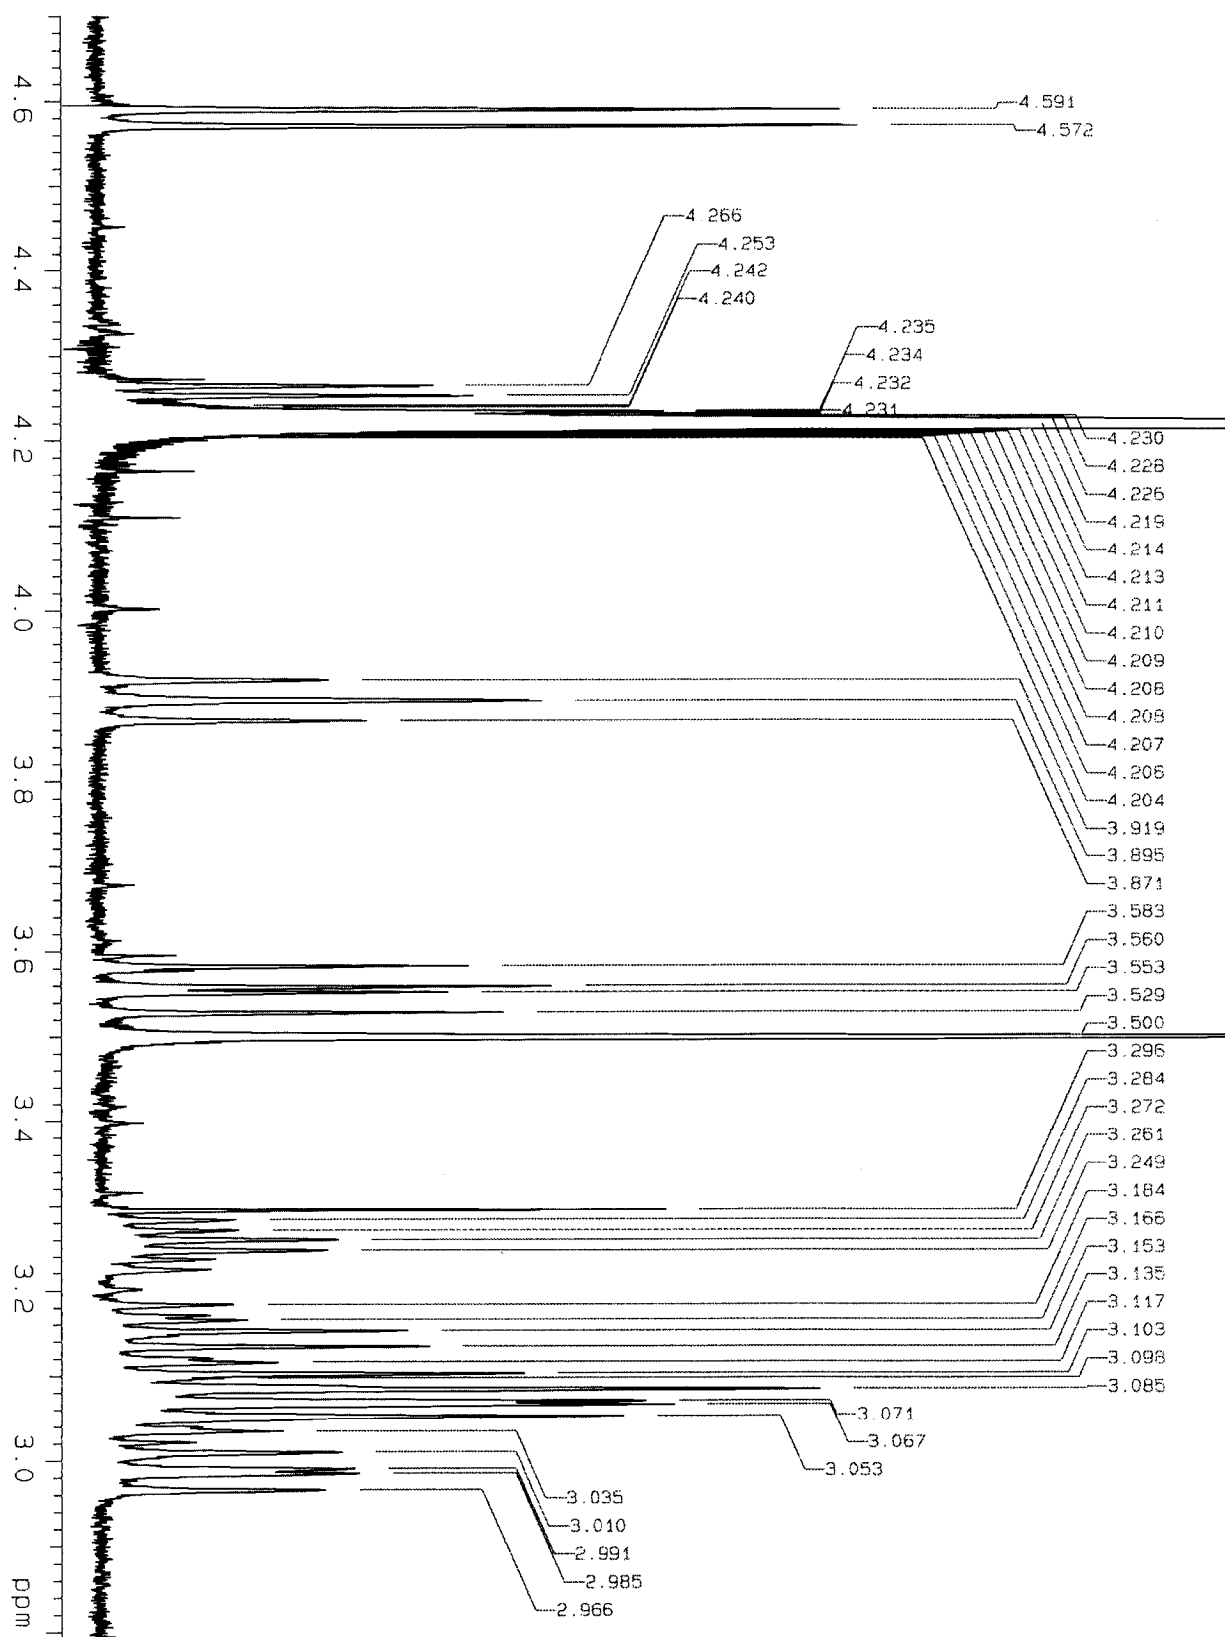

Fig S8.  $^1\text{H}$  NMR of compound **4** in  $\text{D}_2\text{O}$  in the presence of  $\text{CF}_3\text{COOD}$  (1.0 equiv) at  $70^\circ\text{C}$ .

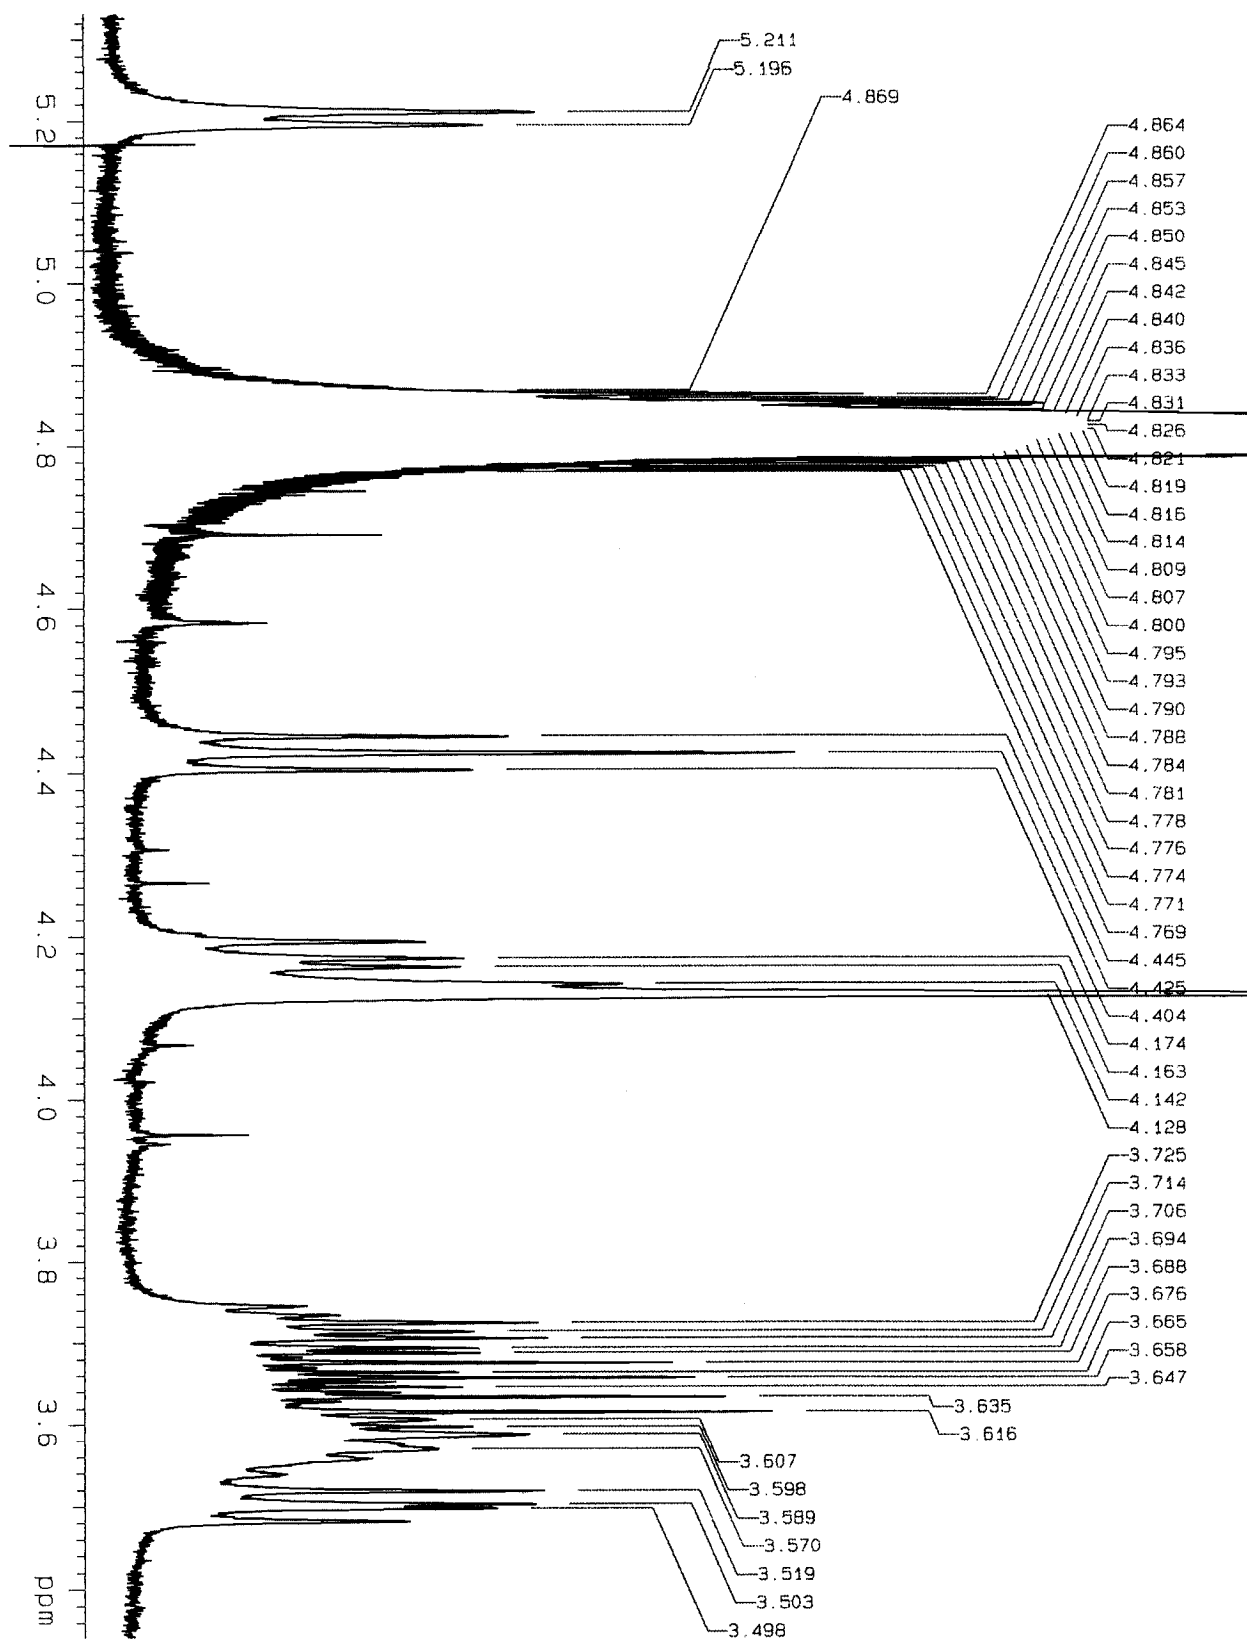

Fig S9.  $^1\text{H}$  NMR of compound **4** in 50 mM AcONa- $d_3$  (pH 7.0) in the presence of  $\text{Zn}(\text{OAc})_2$  (2.0 equiv) at 80 °C.

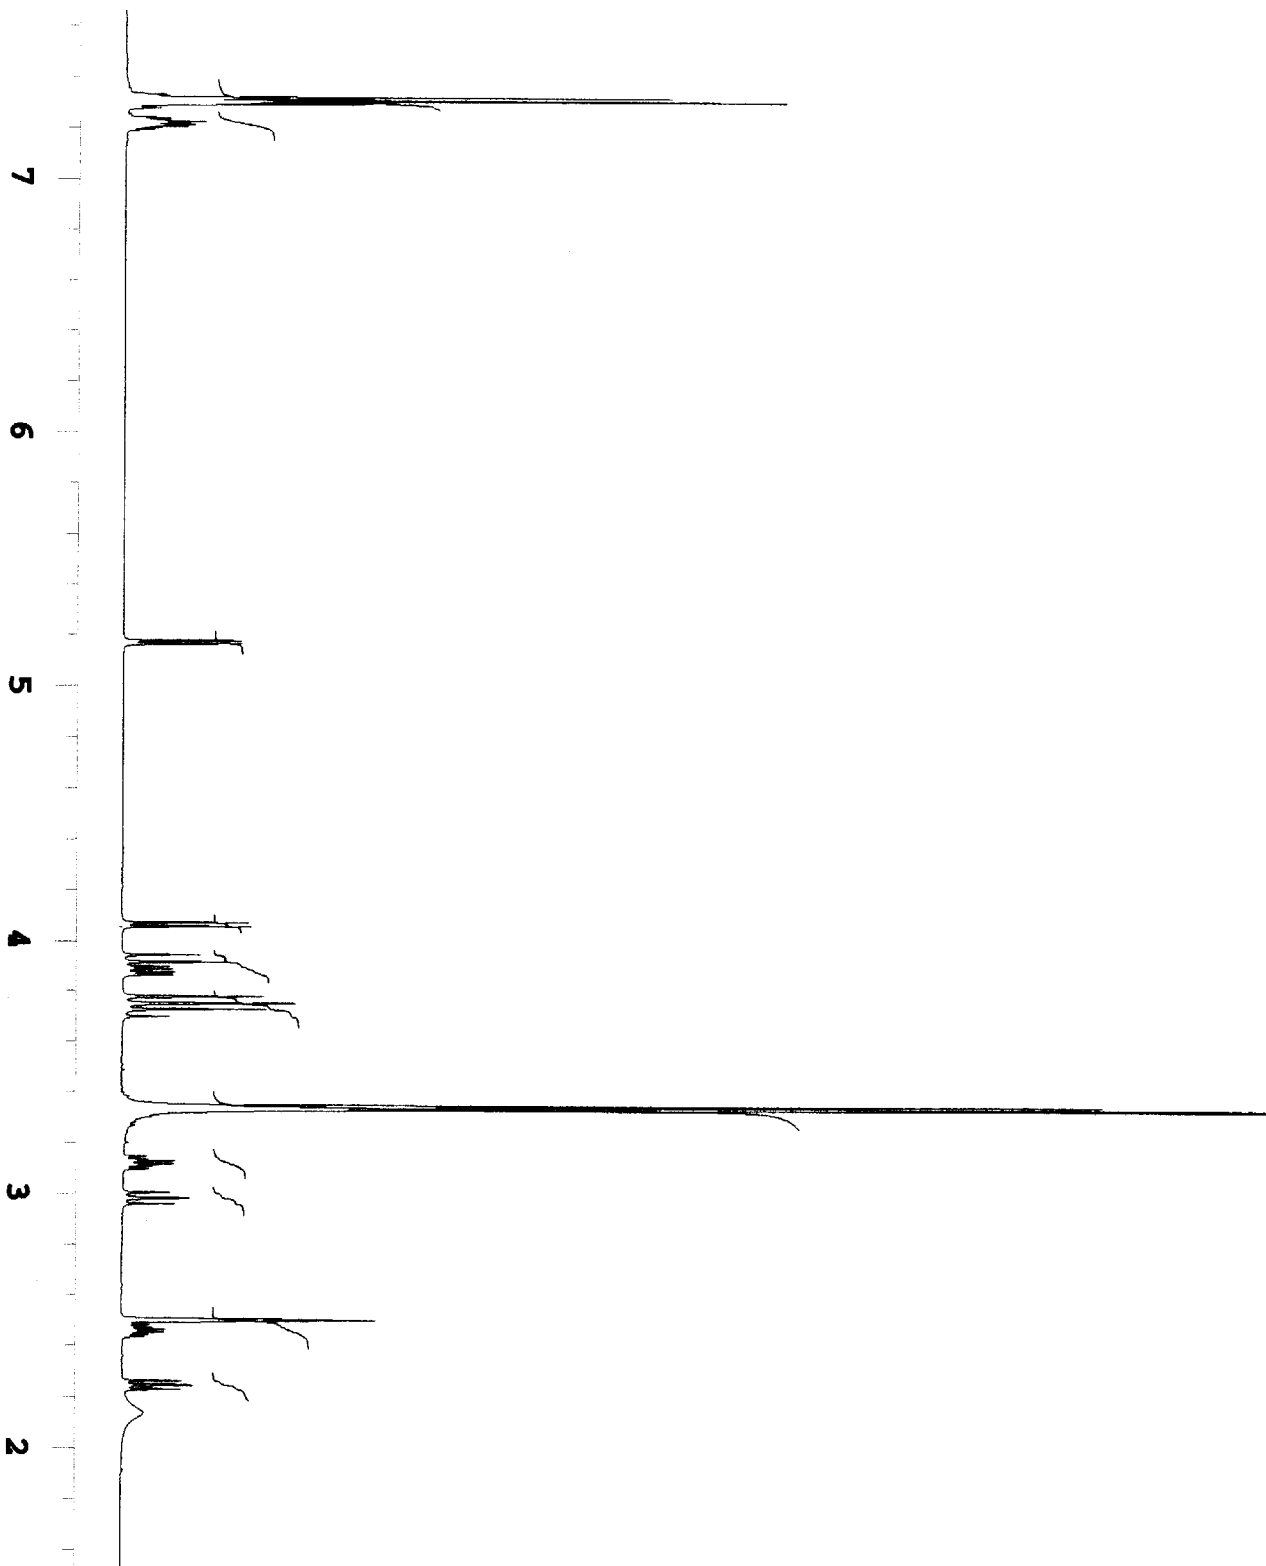

Fig S10.  $^1\text{H}$  NMR of compound **5** in  $\text{DMSO-}d_6$ .

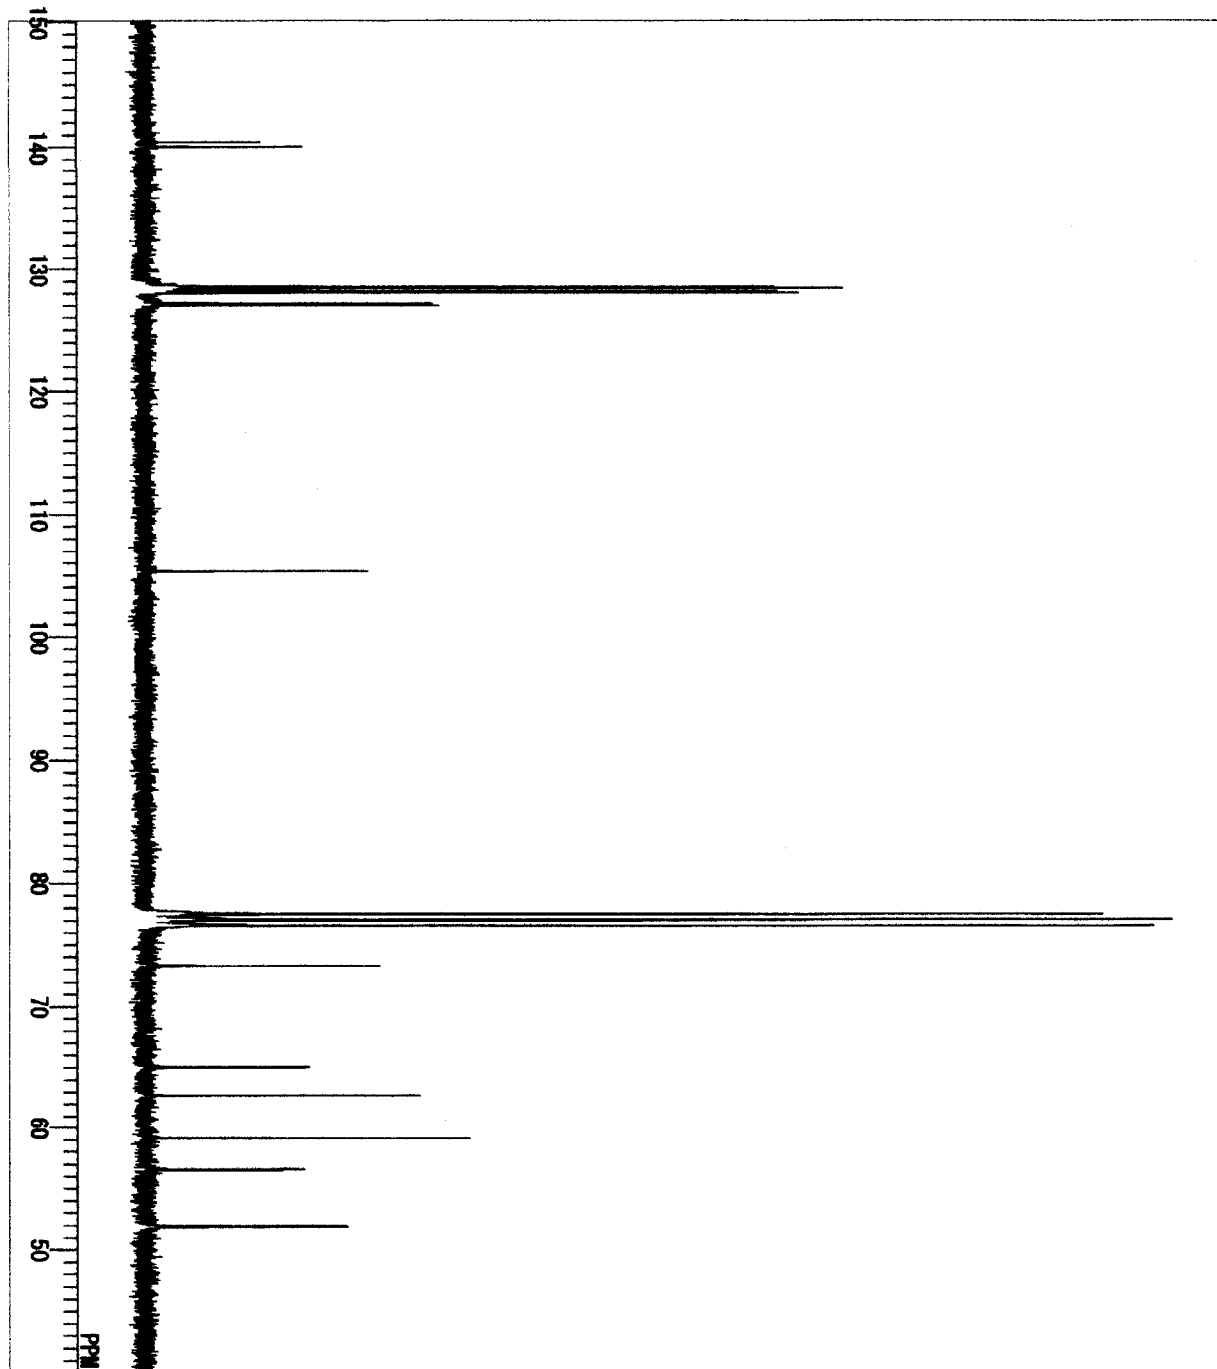

Fig S11.  $^{13}\text{C}$  NMR of compound **5** in  $\text{CDCl}_3$ .

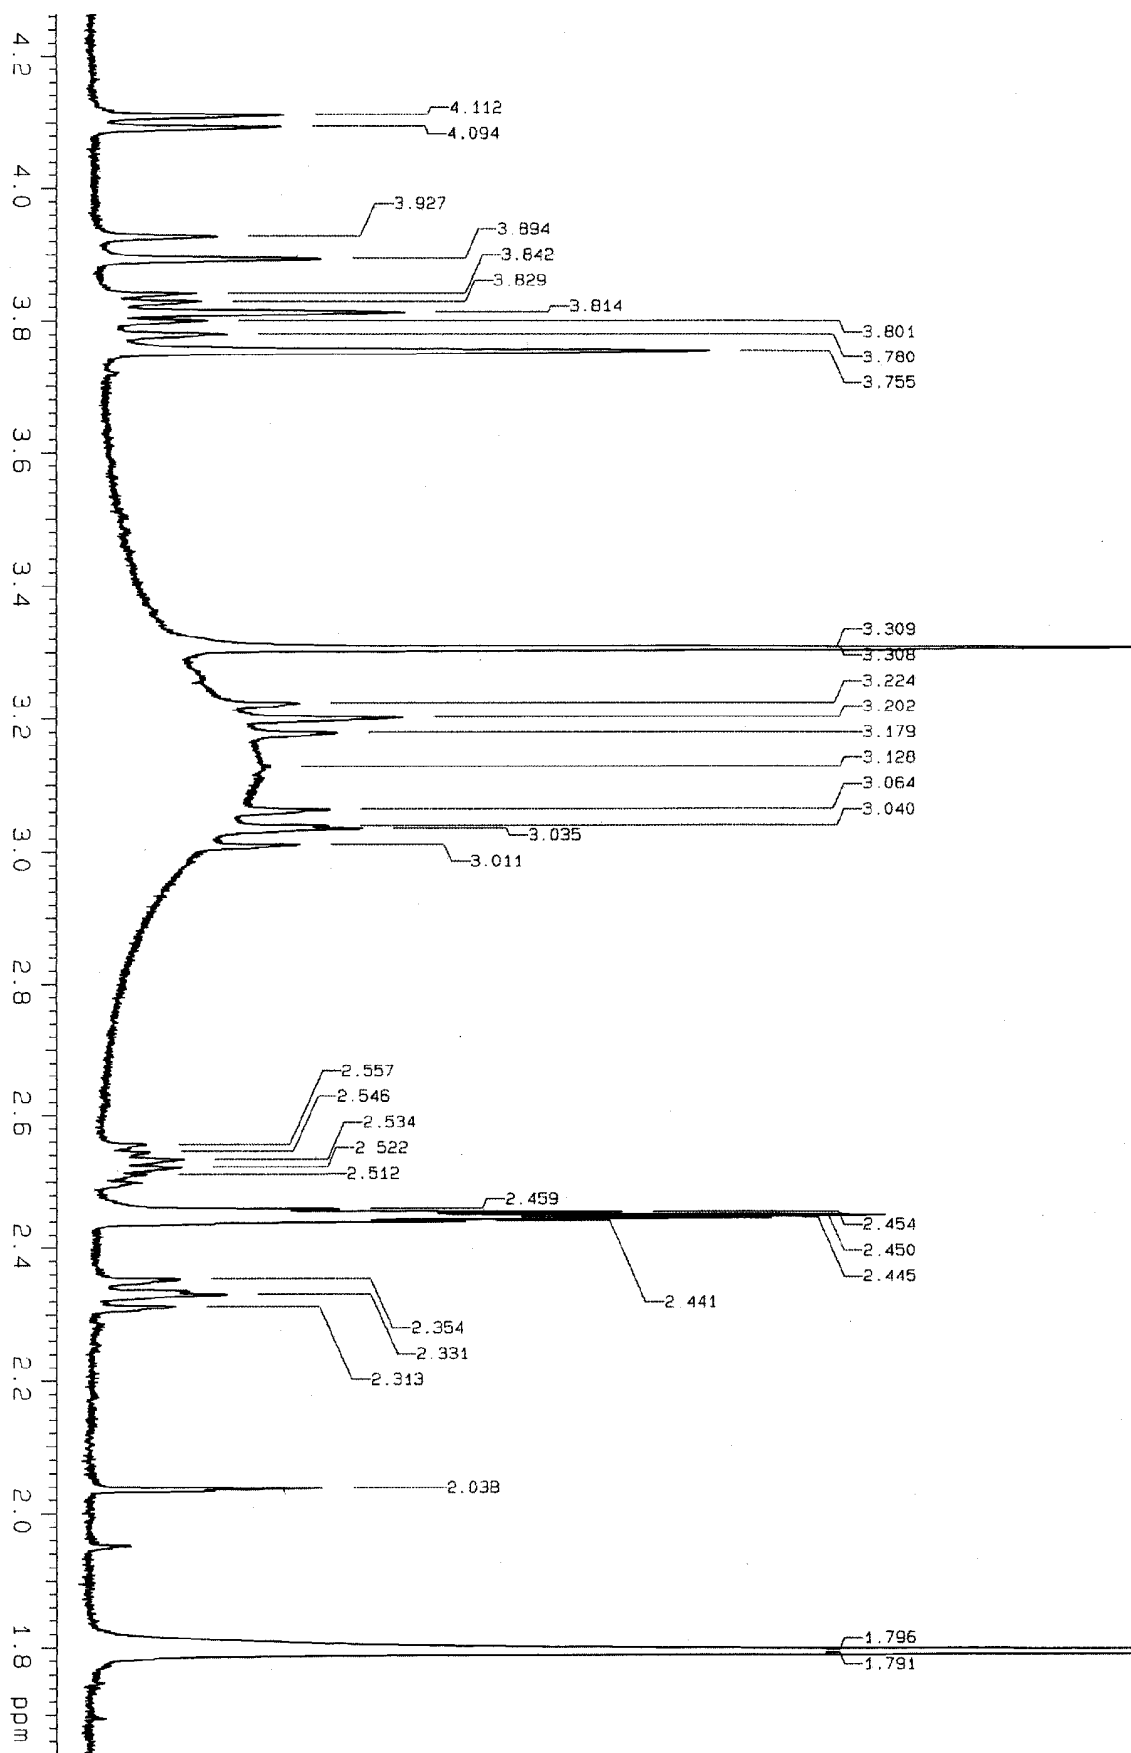

Fig S12. <sup>1</sup>H NMR of compound **5** in DMSO-*d*<sub>6</sub> in the presence of Zn(OAc)<sub>2</sub> (2.0 equiv) at 120 °C.

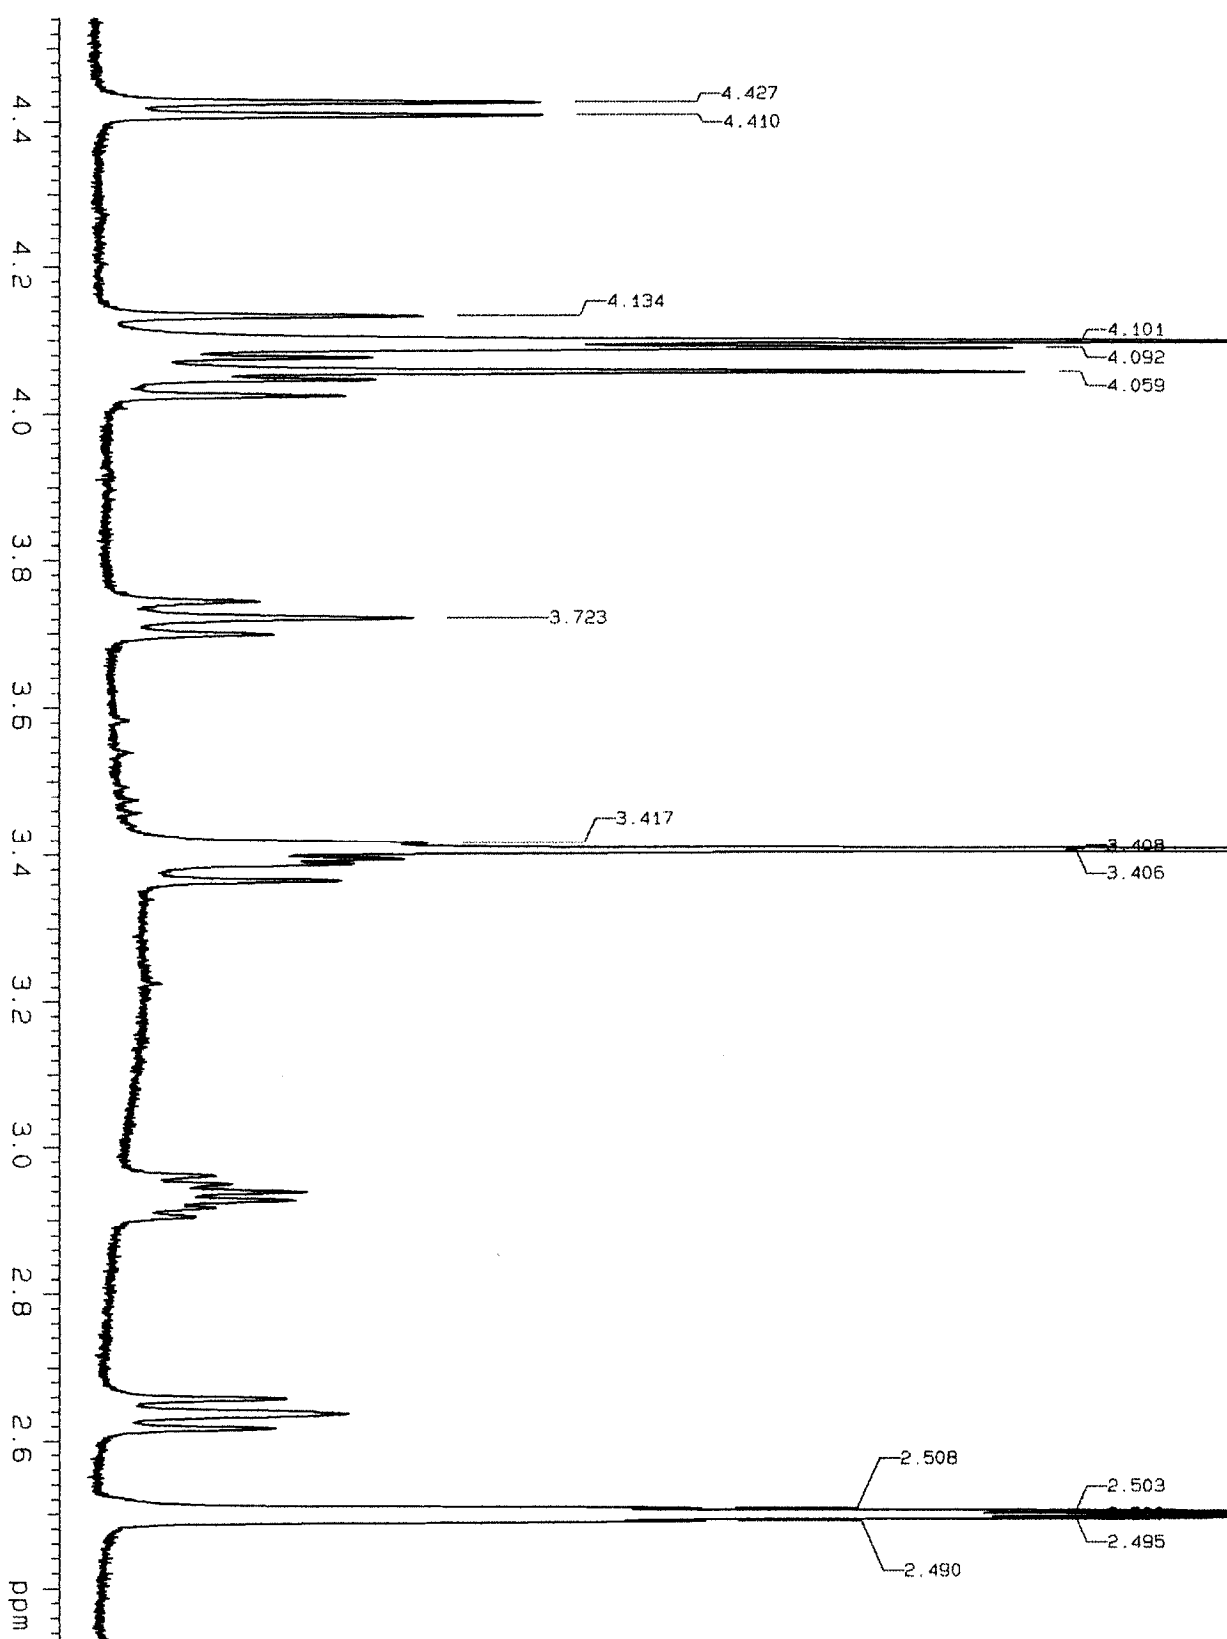

Fig S13. <sup>1</sup>H NMR of compound **5** in DMSO-*d*<sub>6</sub> in the presence of CF<sub>3</sub>COOD (1.0 equiv) at 80 °C.

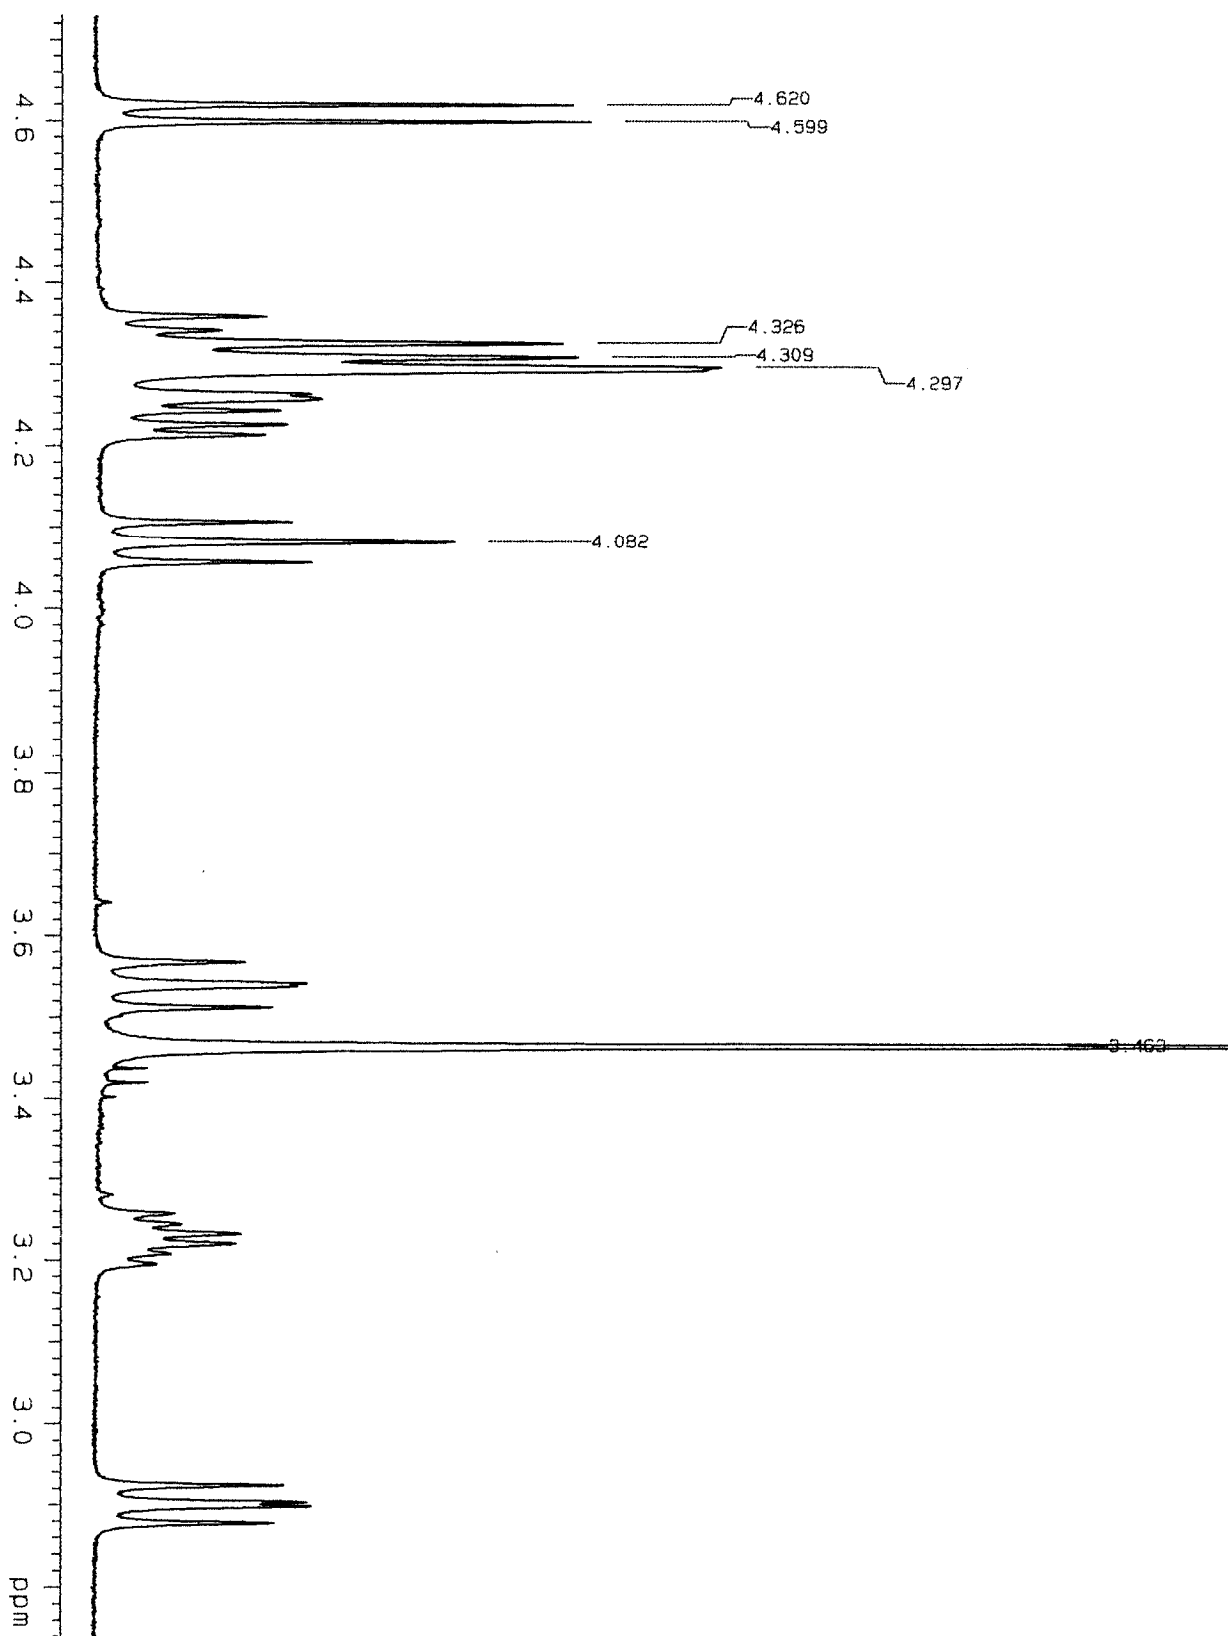

Fig S14.  $^1\text{H}$  NMR of compound **5** in  $\text{DMSO-}d_6$  in the presence of  $\text{CF}_3\text{COOD}$  (10 equiv) at room temperature.
